# Supplementary material for: Hepatocellular carcinoma (HCC) tumor microenvironment is more suppressive than colorectal cancer liver metastasis (CRLM) tumor microenvironment
Source: PubMed Central journal article supplement (PMC11014815; doi:10.1007/s12072-023-10537-6), 2023-05-04

**Supplementary Figure 1. Representative plot of Treg cells from PB-HD and PB-HCC, PT-HCC and TT-HCC patient**

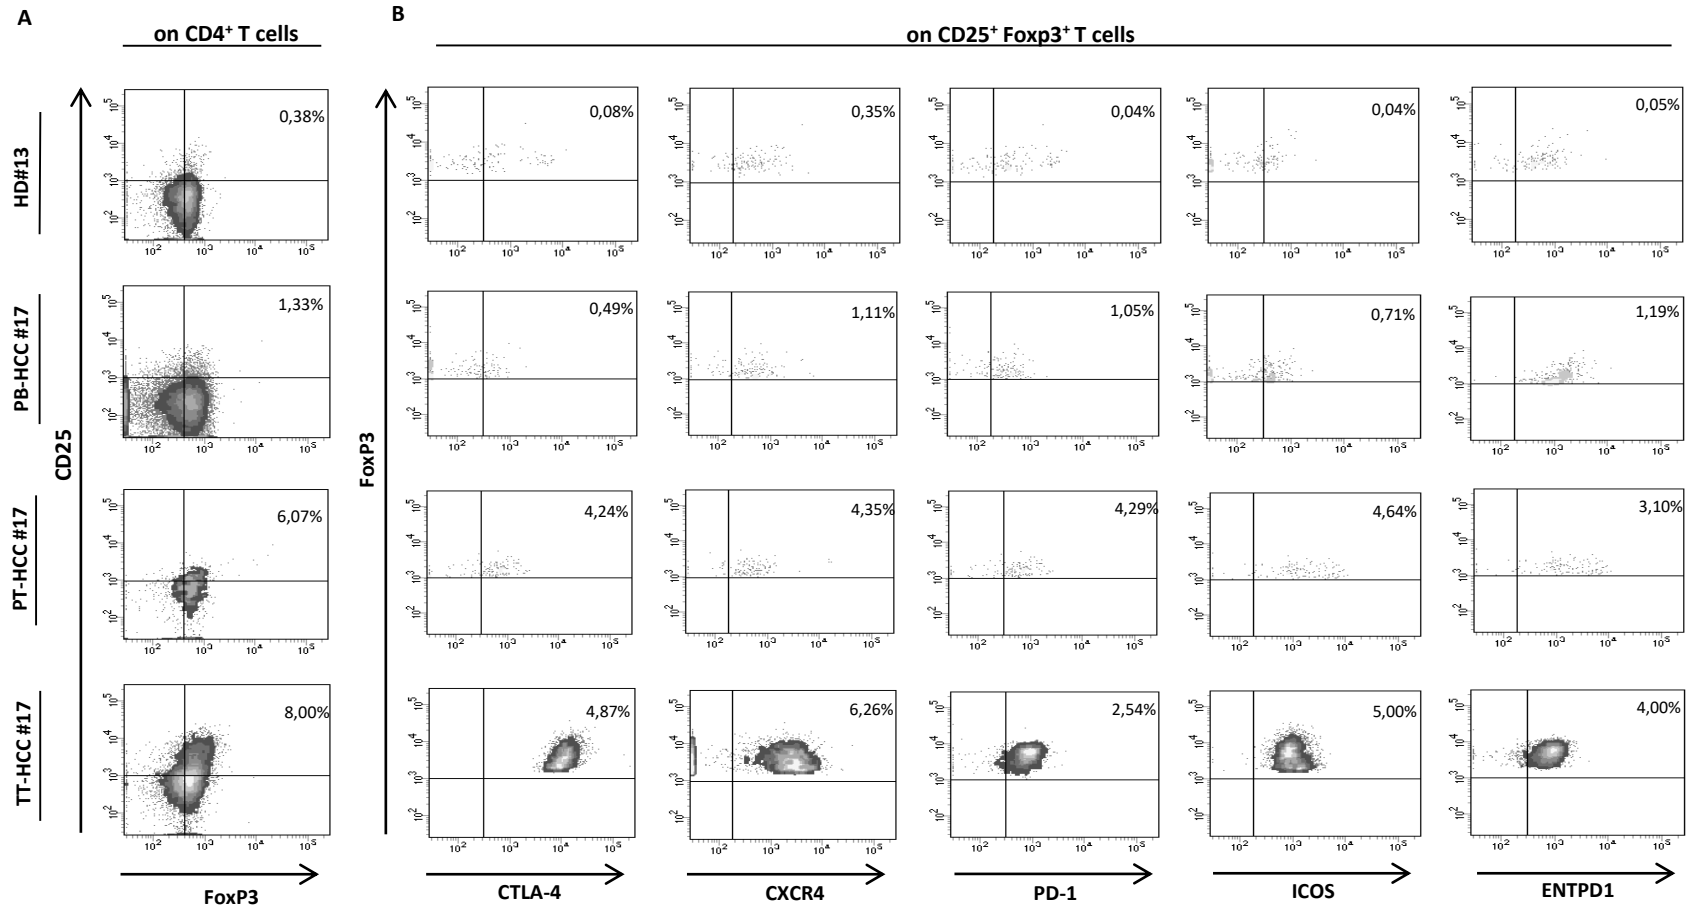

**Supplementary Figure 2. Representative plot of Treg cells from PB-HD and PB-CRLM, PT-CRLM and TT-CRLM patient**

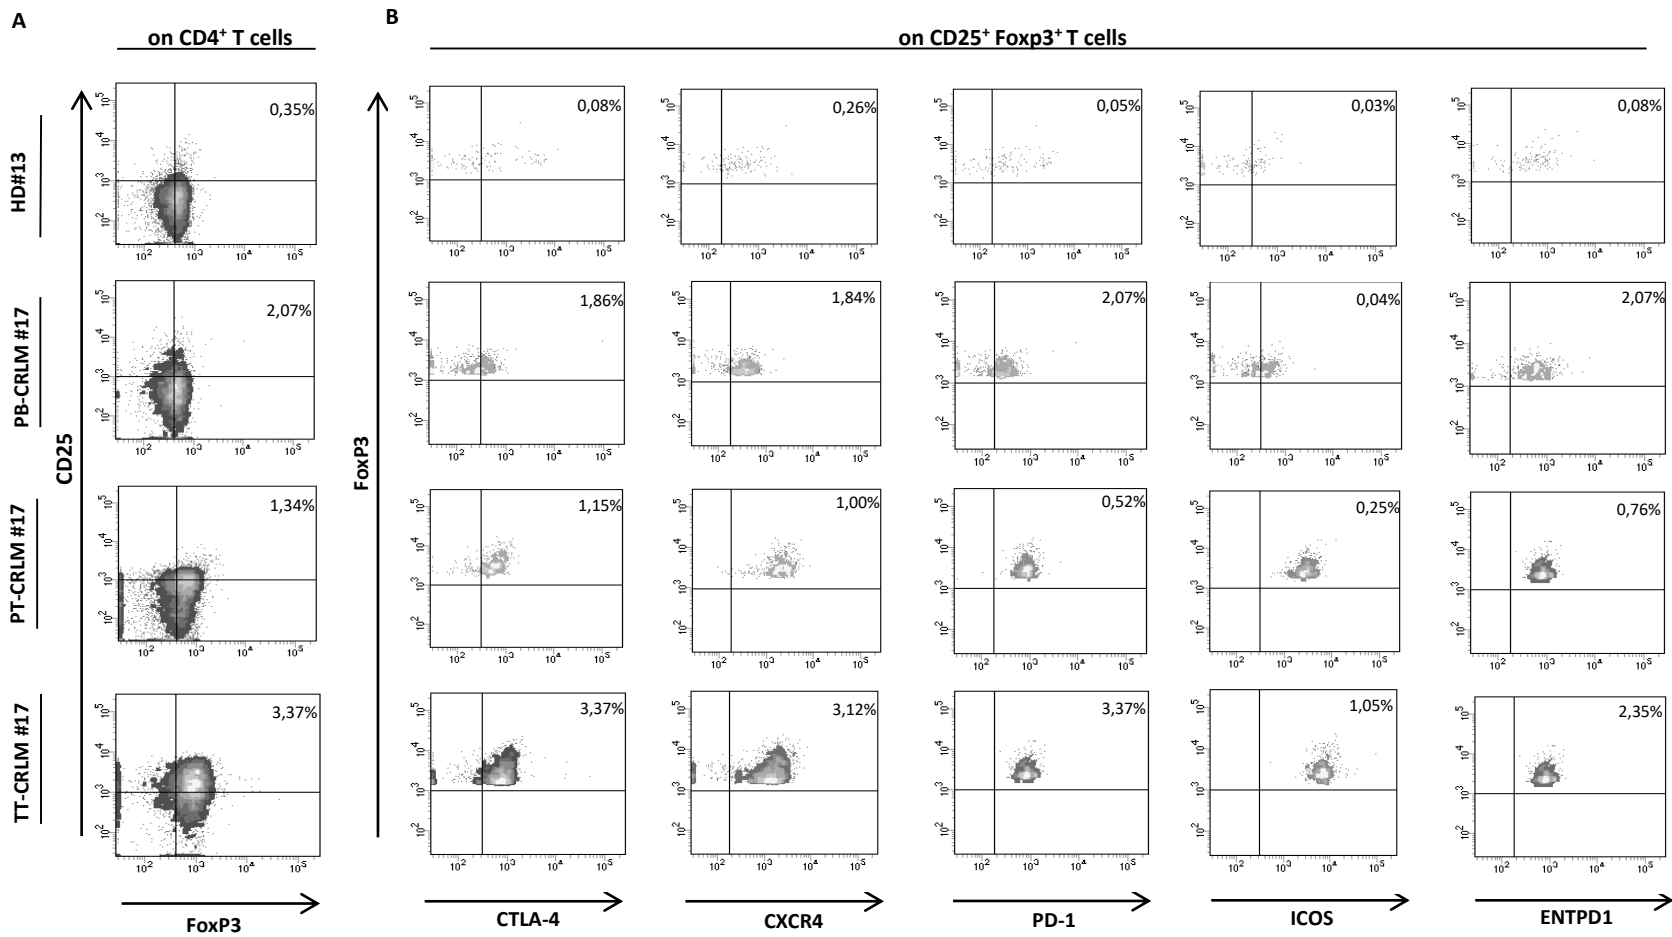

**Supplementary Figure 3. Representative plot of Naïve, Activated and Not suppressive Treg cells from HCC and CRLM**

**A**

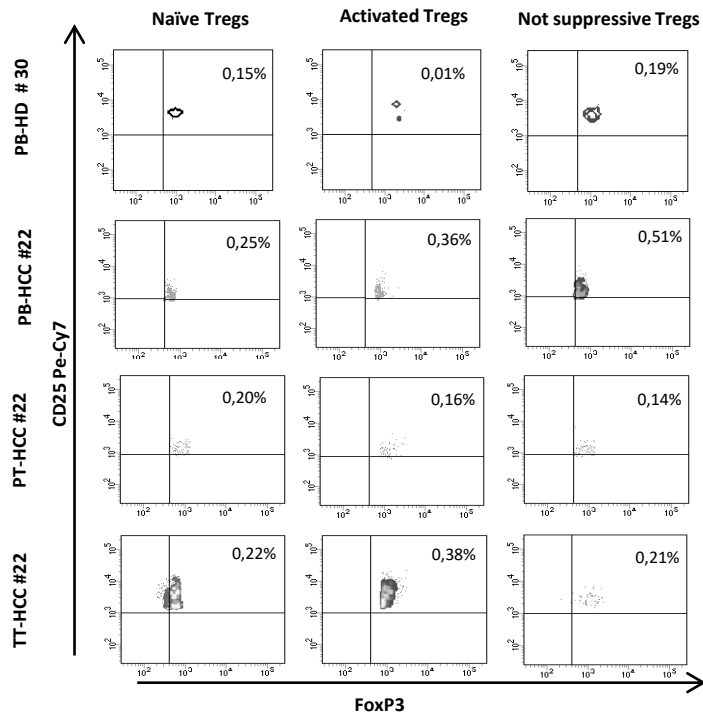

**B**

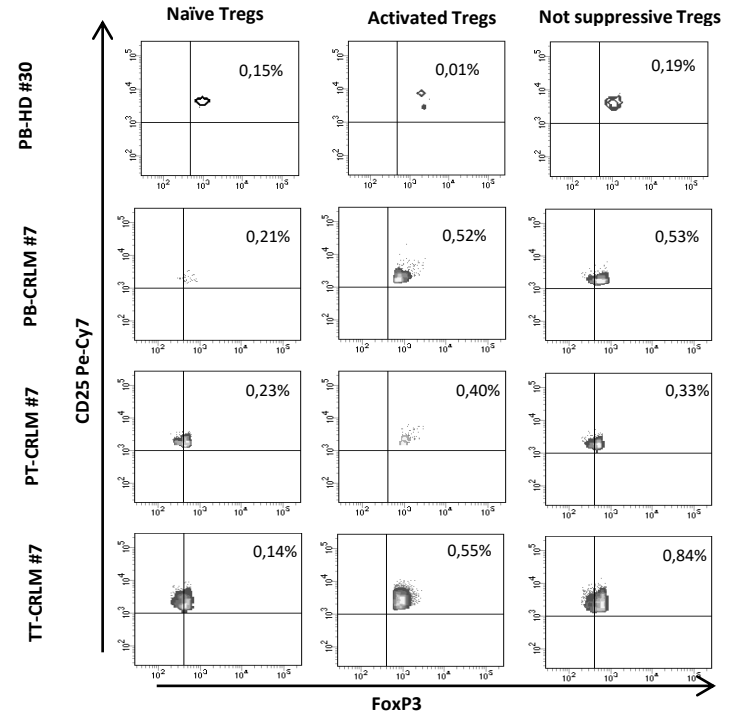

Supplementary Figure 4. Dose escalation functional assay of Tregs suppressive activity in PB of HD subjects, HCC and CRLM patients.

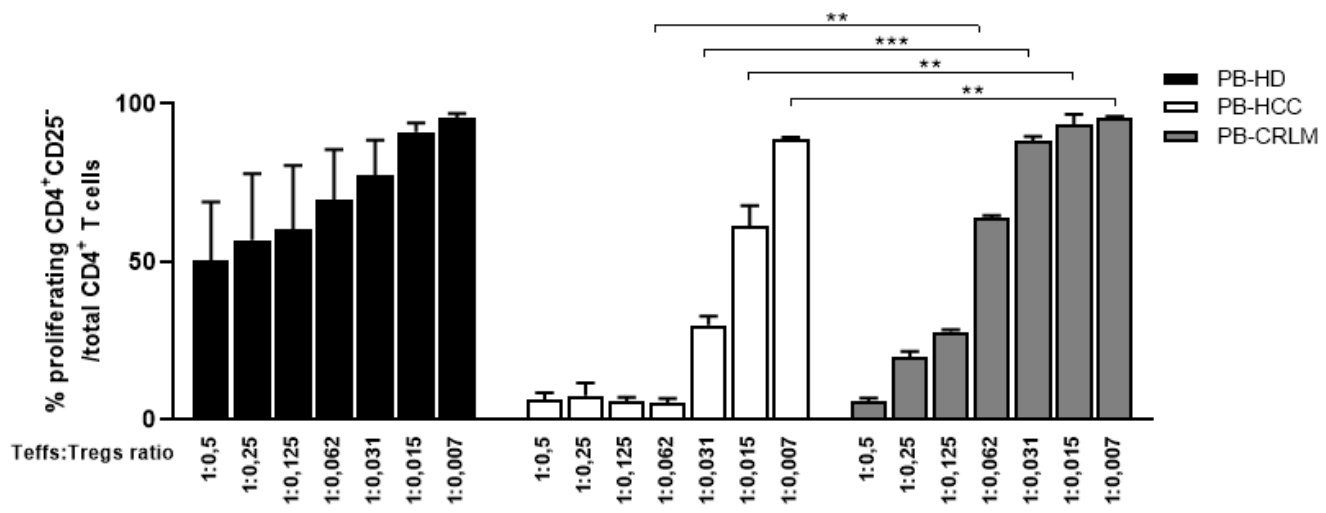

**Supplementary Figure 5. Representative functional analysis of Tregs suppressive activity in PB/PT/TT of HCC and CRLM patients.**

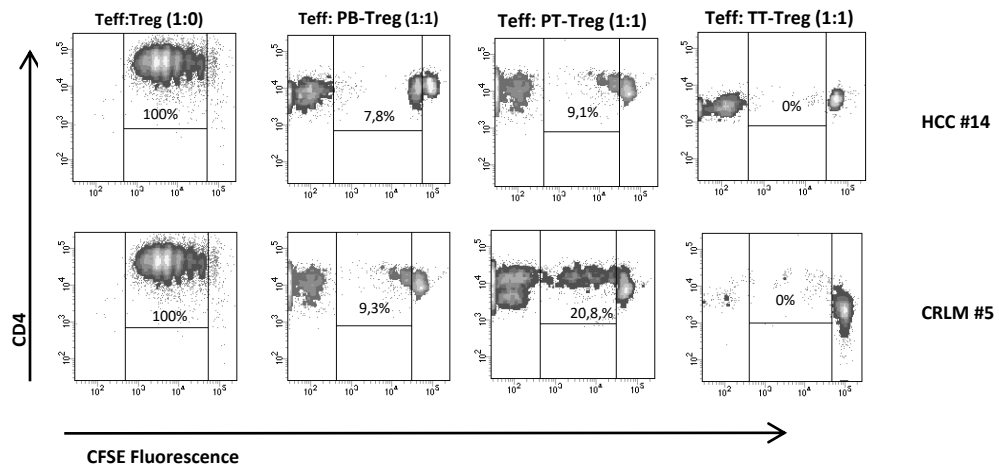

**Supplementary Figure 6. IL-35 secretion by Tregs and Teffs of PB-HD, -HCC and -CRLM**

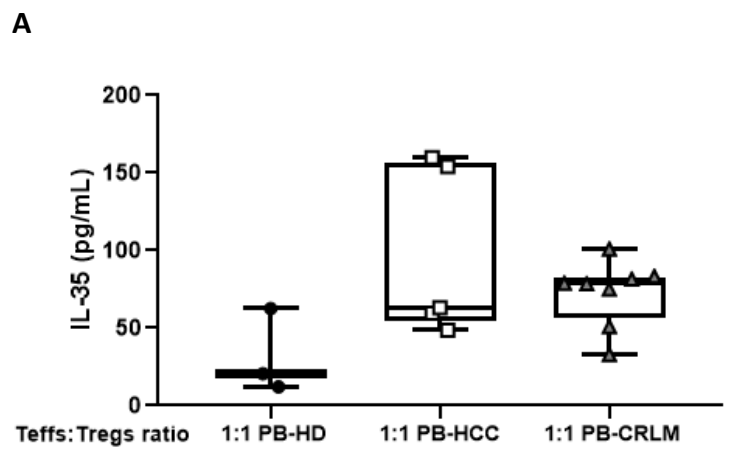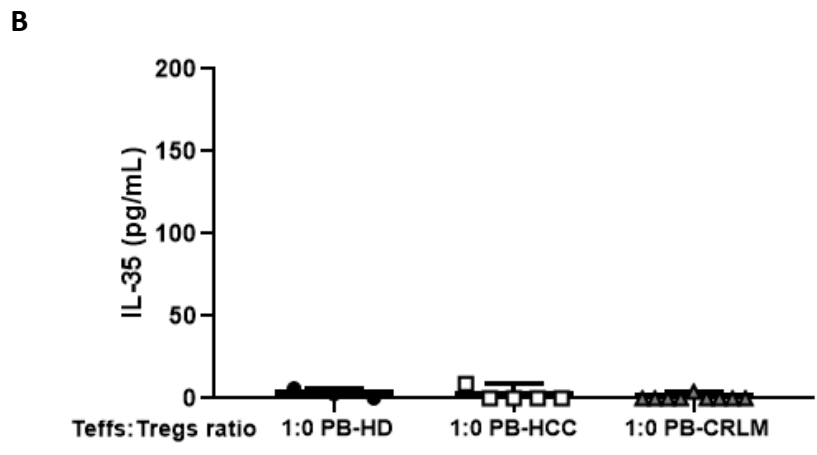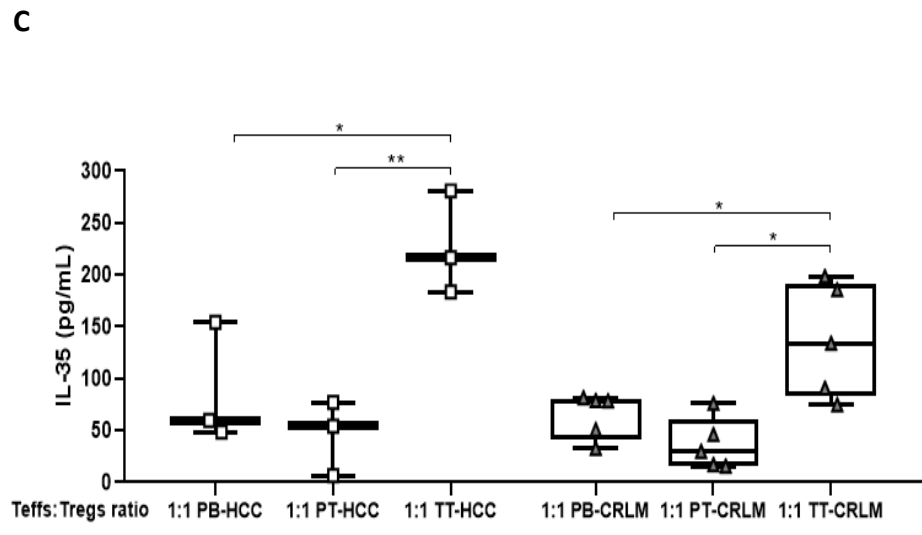

Supplementary Figure 7. Proliferation and IFN- $\gamma$  secretion in Tregs of HCC and CRLM

A

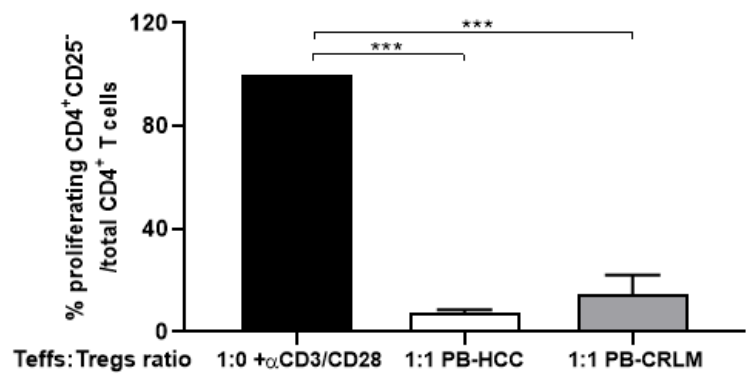

B

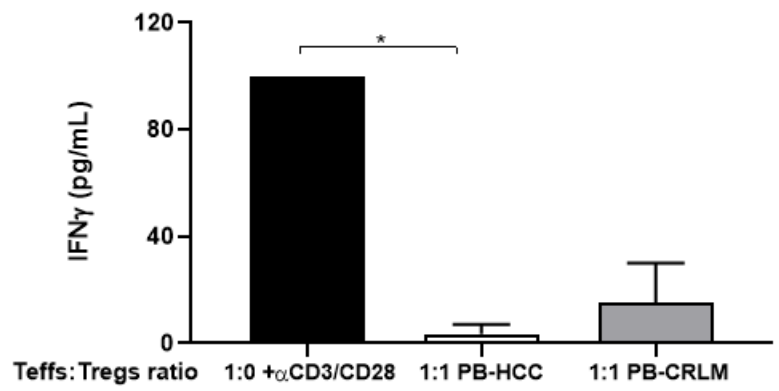

**Supplementary Figure 8. Ki67 frequency of positive cells in coculture of tumor cells and PBMC from HCC and CRLM patients**

**A**

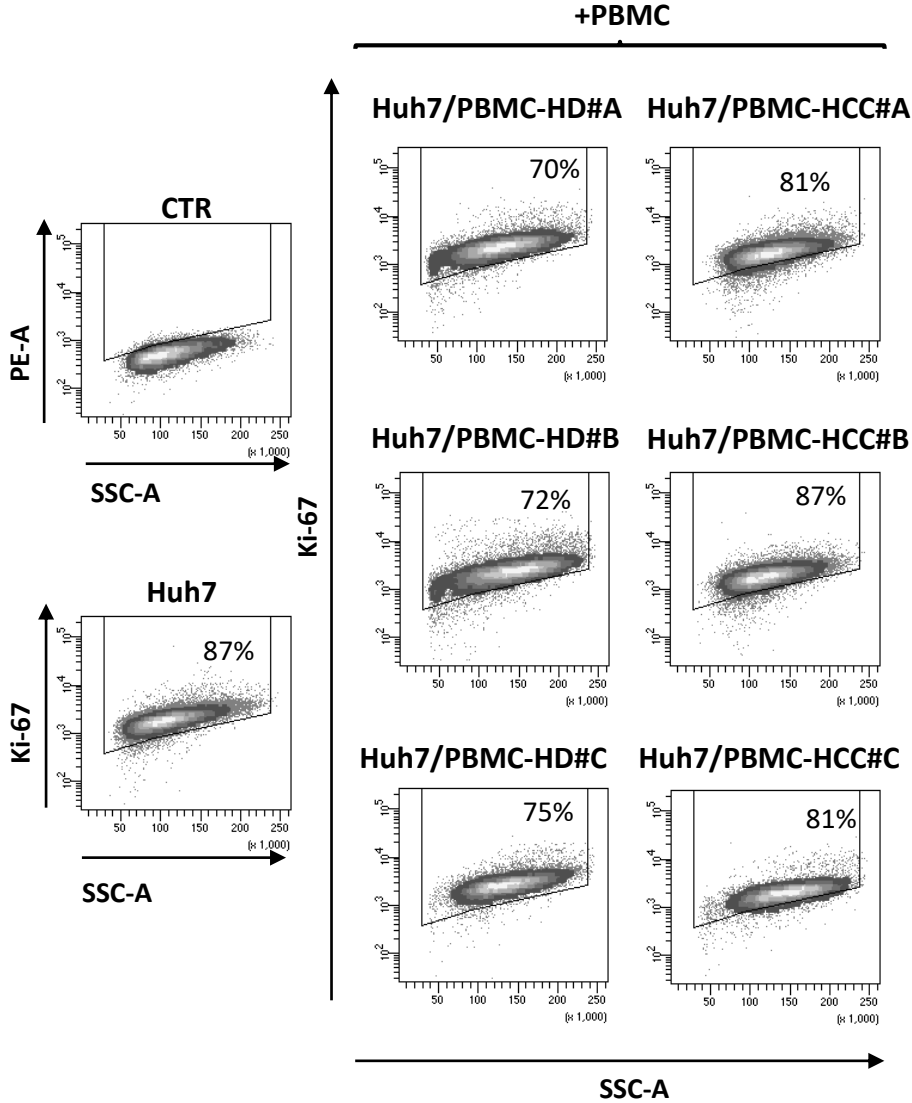

**B**

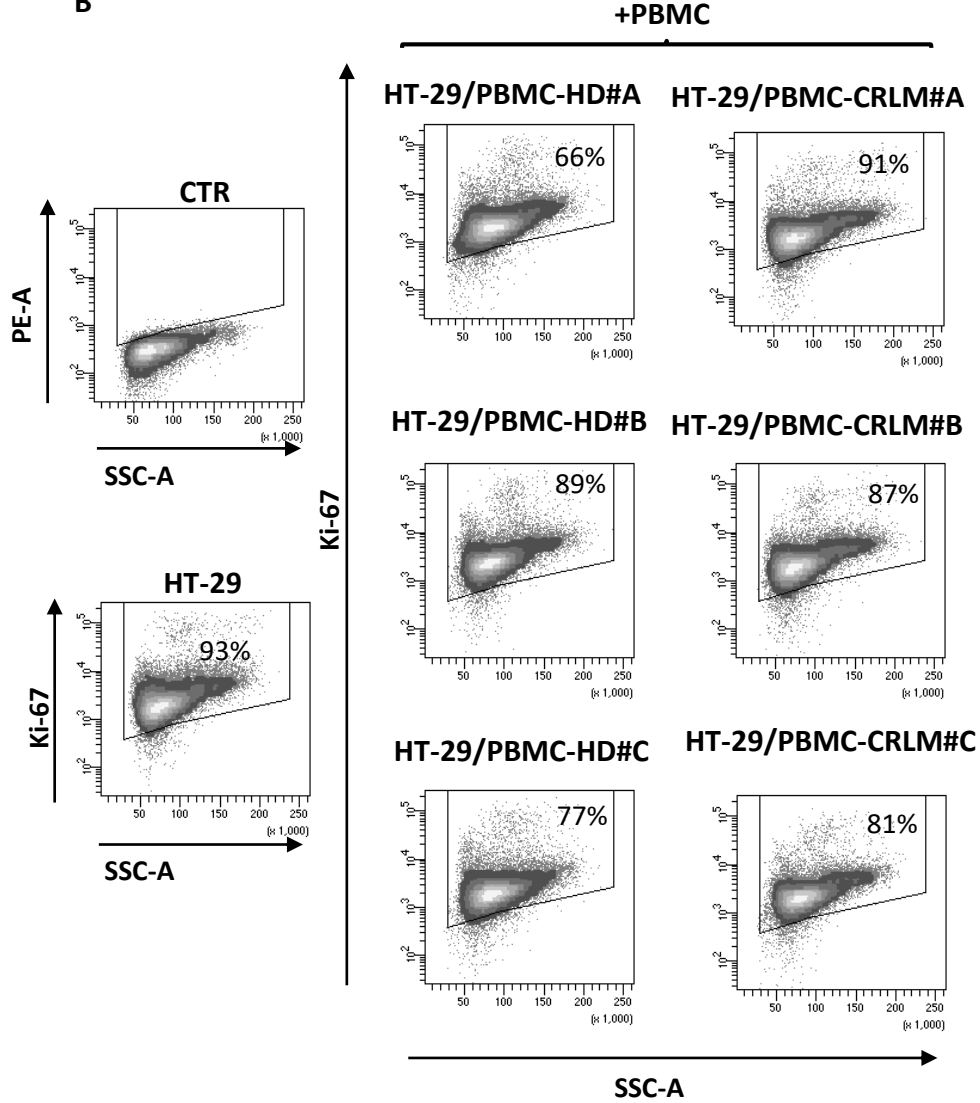



# Supplementary Figure 9. Higher percentage of PT-TT-Tregs and MDSCs in HCC tumors

**A**

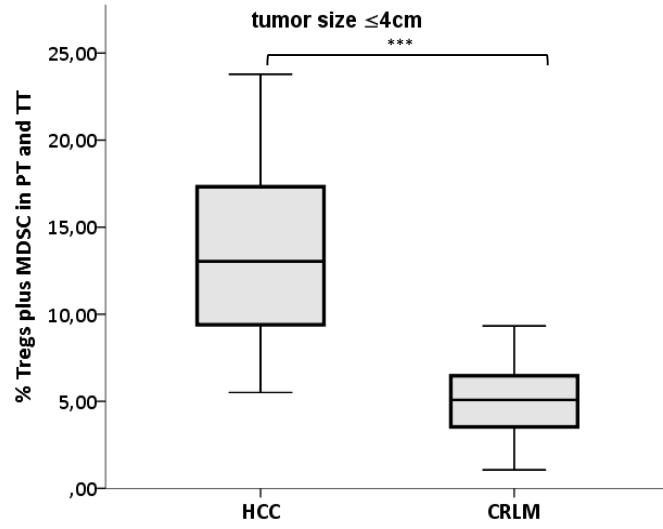

**B**

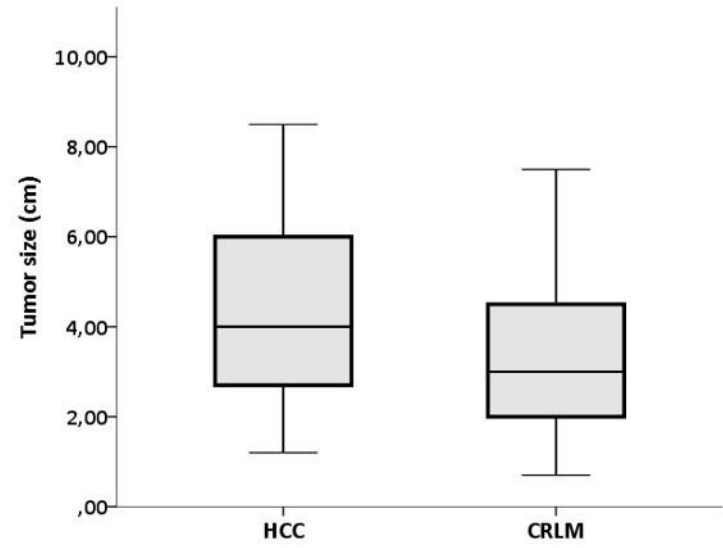

**Supplementary Figure 10. Effect of CXCR4 inhibition in PB-HCC/CRLM derived Tregs**

**A**

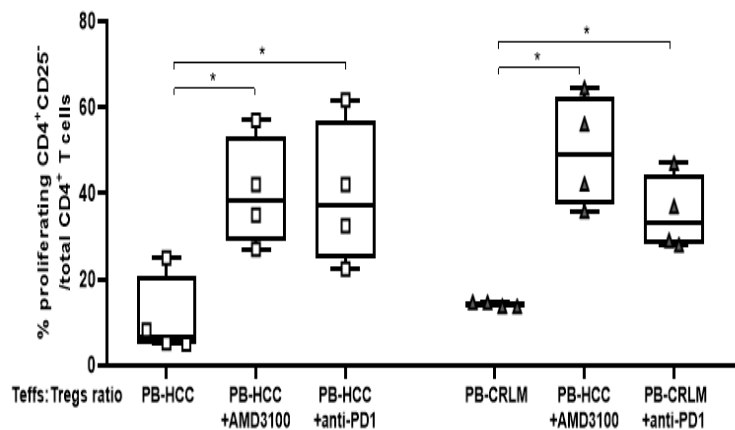

**B**

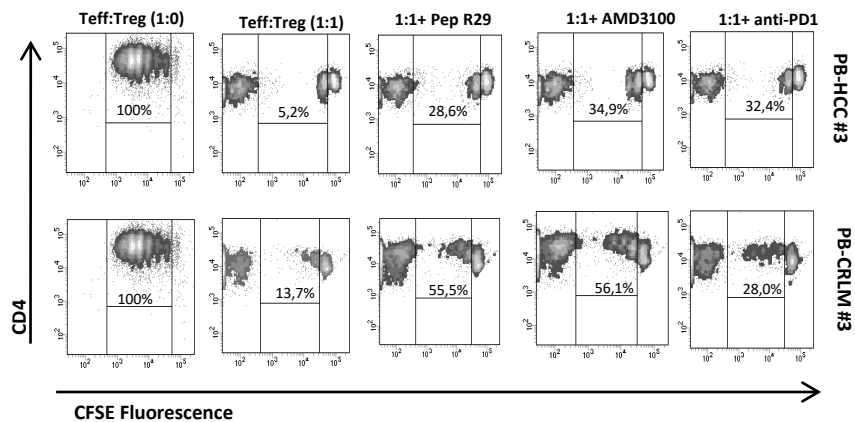

**C**

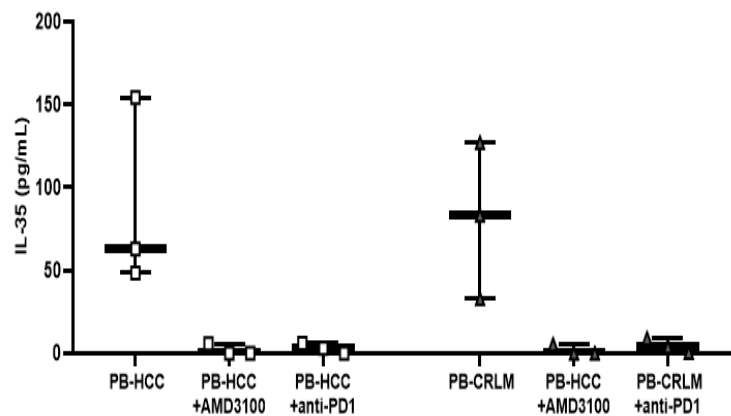

**D**

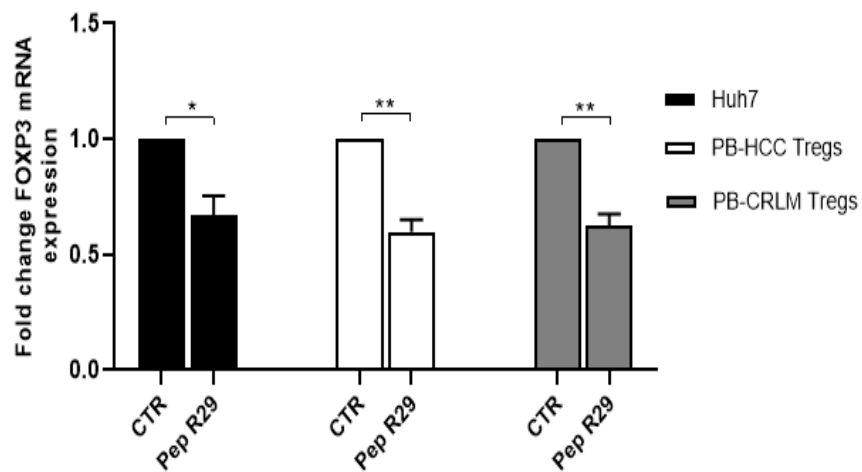

Supplement: 12072_2023_10537_MOESM1_ESM.pdf [file 12072_2023_10537_MOESM1_ESM.pdf]
